# Supplementary material
Source: PubMed Central journal article supplement (PMC4188687)
Supplement: supp_131778_five-parox-1-at.pdf [file supp_131778_five-parox-1-at.pdf]

### **Appendix 1: References**

1. Menezes AR, Lavie CJ, Dinicolantonio JJ, et al. Atrial fibrillation in the 21st century: a current understanding of risk factors and primary prevention strategies. *Mayo Clin Proc* 2013;88:394-409.
2. Reed JL, Mark AE, Reid RD, et al. The effects of chronic exercise training in individuals with permanent atrial fibrillation: a systematic review. *Can J Cardiol* 2013;29:1721-8.
3. Giacomantonio NB, Bredin SS, Foulds HJ, et al. A systematic review of the health benefits of exercise rehabilitation in persons living with atrial fibrillation. *Can J Cardiol* 2013;29:483-91.
4. Wann LS, Curtis AB, Ellenbogen KA, et al. 2011 ACCF/AHA/HRS focused update on the management of patients with atrial fibrillation (update on dabigatran): a report of the American College of Cardiology Foundation/American Heart Association Task Force on practice guidelines. *J Am Coll Cardiol* 2011;57:1330-7.
5. Zanettini R, Centeleghe P, Franzelli C, et al. Validity of the talk test for exercise prescription after myocardial revascularization. *Eur J Prev Cardiol* 2013;20:376-82.
